# Supplementary material for: EU-AIMS Longitudinal European Autism Project (LEAP): the autism twin cohort
Source: Mol Autism. 2018 Apr 13;9:26. doi: 10.1186/s13229-018-0212-x (PMC5899373; doi:10.1186/s13229-018-0212-x)
Supplement: Supplementary file 1 — Table S1. Summary of Study protocol for the LEAP twins. (DOCX 33 kb) [file 13229_2018_212_MOESM1_ESM.docx]

**Table S1** Summary of Study protocol for the LEAP twins

| **Domain / Task** | **Test/questionnaire** |
| --- | --- |
| Clinical ASD diagnosis | - Autism Diagnostic Interview-Revised (ADI-R)a,c |
|  | - Autism Diagnostic Observation Schedule (ADOS or ADOS-2)a,c |
|  |  |
| Dimensional measures of ASD symptoms | - Social Responsiveness Scale-2nd Edition (SRS-II)a,p |
| - Repetitive Behaviour Scale-Revised (RBS-R)p |
|  | - Sensory Profile (SP)a,s,p |
|  | - Children’s Social Behaviour Questionnaire (CSBQ)p - Adults’ Social Behaviour Questionnaire (ASBQ)p,s |
|  | - Autism Quotient (AQ), AQ-Adol, AQ-Childa,p,s |
|  |  |
| Comorbidities | - DSM-5 ADHD rating scalep,s |
|  | - Kiddie Schedule for Affective Disorders and Schizophrenia (K-SADS)a,c - The Structured Clinical Interview for DSM-IV (SCID, axis I)a,c |
|  | - The Diagnostic Interview for ADHD in adults (DIVA)a,c |
|  |  |
| Quality of life / Adaptive Behaviour | - Vineland Adaptive Behaviour Scale-2nd Ed (VABS-2)a,p |
|  | - Columbia Impairment Scale (CIS)p,s |
|  |  |
| Medical or Psychiatric History | - NIH ACE Subject Medical History Questionnairep,s |
|  | - NIH ACE Family History Formp,s |
|  |  |
|  |  |
| Cognitive and Psychological Profile | - Wechsler Intelligence Scales for Children or Adults-IV (WISC-IV/WAIS-IV/WASI-II)a,c |
|  | - Leiter-revised scales in combination with the Peabody Picture Vocabulary Test Third Editiona,c |
|  | - Probabilistic reversal learningc |
|  | - Un/Segmented block design taskc |
|  | - Animated shapes narratives taskc |
|  | - Reading the Mind in the Eyes task (RMET)a,c |
|  | - Sandbox continuous false belief taskc |
|  |  |
| Neuroimaging | - Magnet Resonance Spectroscopy c - Magnetic Resonance Imagingc |
|  |  |
| Eye-tracking | - Natural scenes: static and dynamicc |
|  | - Gap overlapc |
|  | - Implicit false belief c |
|  | - Pupillary light reflexc |
|  | - Biological motionc |
|  | - Emotion matching taskc |
|  | - Change detection taskc |
|  |  |
| Biological samples | - Blood sample (for genomic analyses)a,c |
|  | - Saliva (for genomic analyses where blood samples cannot be obtained and for epigenetics)a,c |
|  | - Urine (at home, for biochemical biomarkers)a,c |
|  |  |
| Assessment of clinical symptoms in both biological parents | - Social Responsiveness Scale (SRS-2)s - DSM-5 ADHD rating scales |

*Note*. Number of tests used may vary depending on participants age and presence of an intellectual disability (see Loth et al., 2017). aIncluded in the RATSS study; c, clinician-rated/administrated; p, reported by parent; s, self-reported. ADHD, attention-deficit hyperactivity disorder; ASD, autism spectrum disorder; Base, baseline assessment wave; DSM, Diagnostic and Statistical Manual of Mental Disorders; NIH ACE, US National Institutes of Health Autism Centers of Excellence.
